# Supplementary material for: Formation of Al2H7− anions — indirect evidence of volatile AlH3 on sodium alanate using solid-state NMR spectroscopy
Source: Royal Society of Chemistry journal article supplement (doi:10.1039/c1cp21877h), 2011-01-01
Supplement: c1cp21877h.pdf [file c1cp21877h.pdf]

## Supporting Information

Formation of  $\text{Al}_2\text{H}_7^-$  anions – Indirect evidence of volatile  $\text{AlH}_3$  on sodium alanate using solid-state NMR spectroscopy

Michael Felderhoff and Bodo Zibrowius

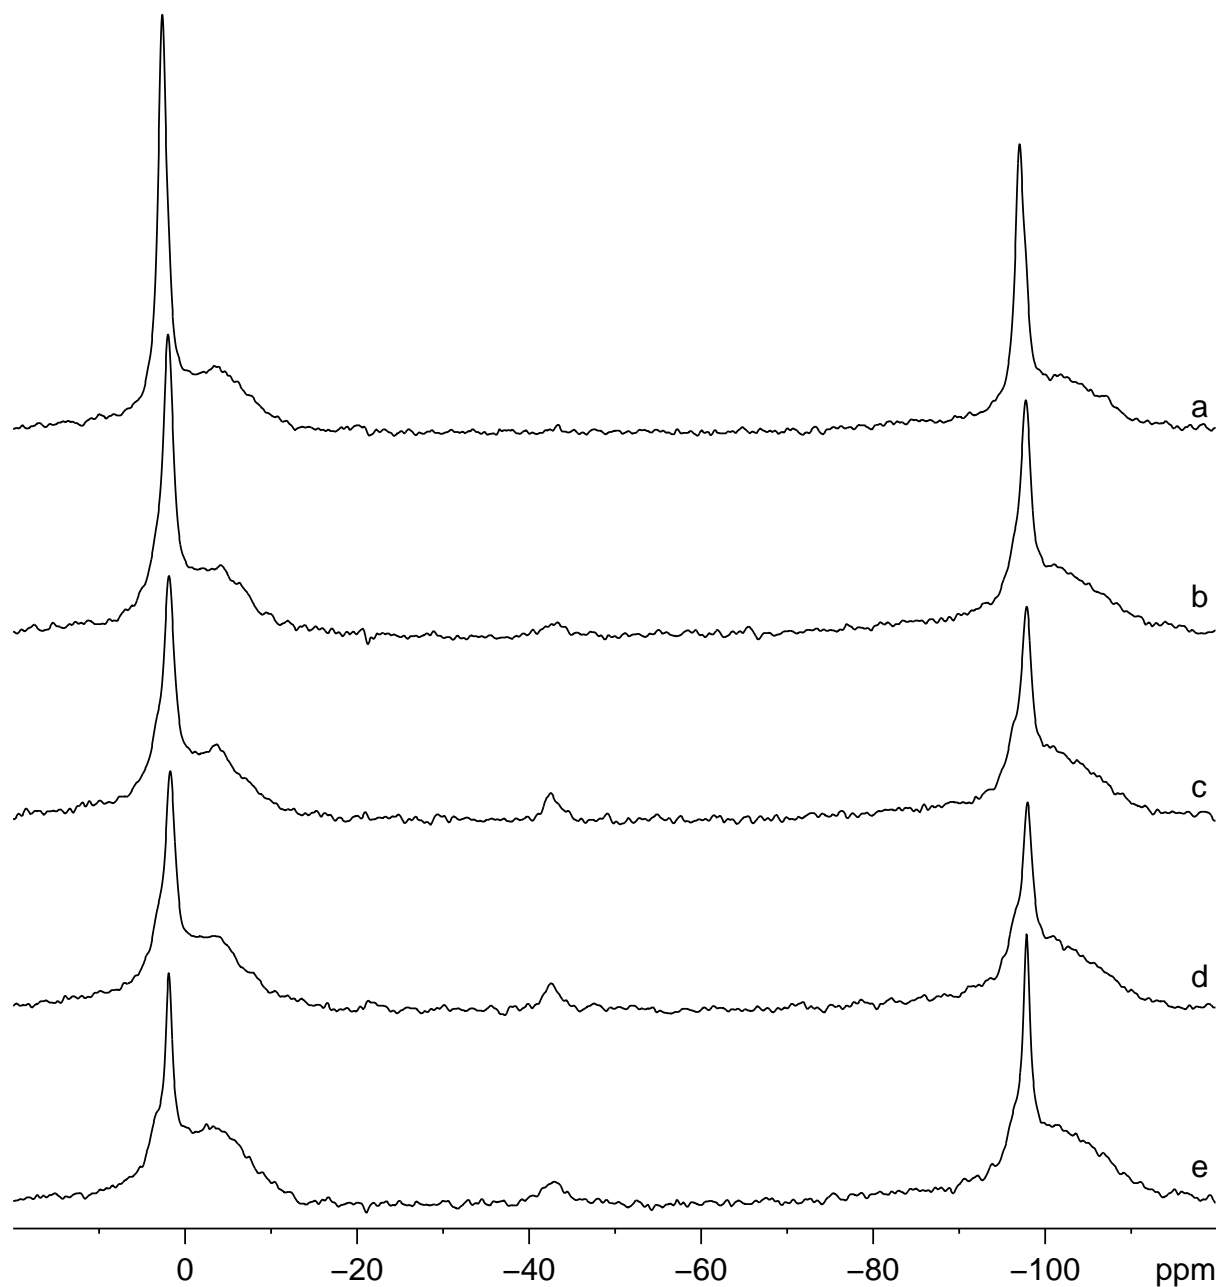

**Fig. S1**  $^{27}\text{Al}$  MAS NMR spectra of a 10:1 mixture of  $\text{NaAlH}_4$  and 18C6 after ball-milling recorded (a) at 311 K, (b) after 10 min at 338 K, (c) after 100 min at 338 K, (d) after additional 10 min at 343 K, and (e) after overnight cooling to 311 K. These are the same spectra as in Fig. 1, but showing the region with the growing line of  $\text{Na}_3\text{AlH}_6$  at  $-42.5$  ppm.

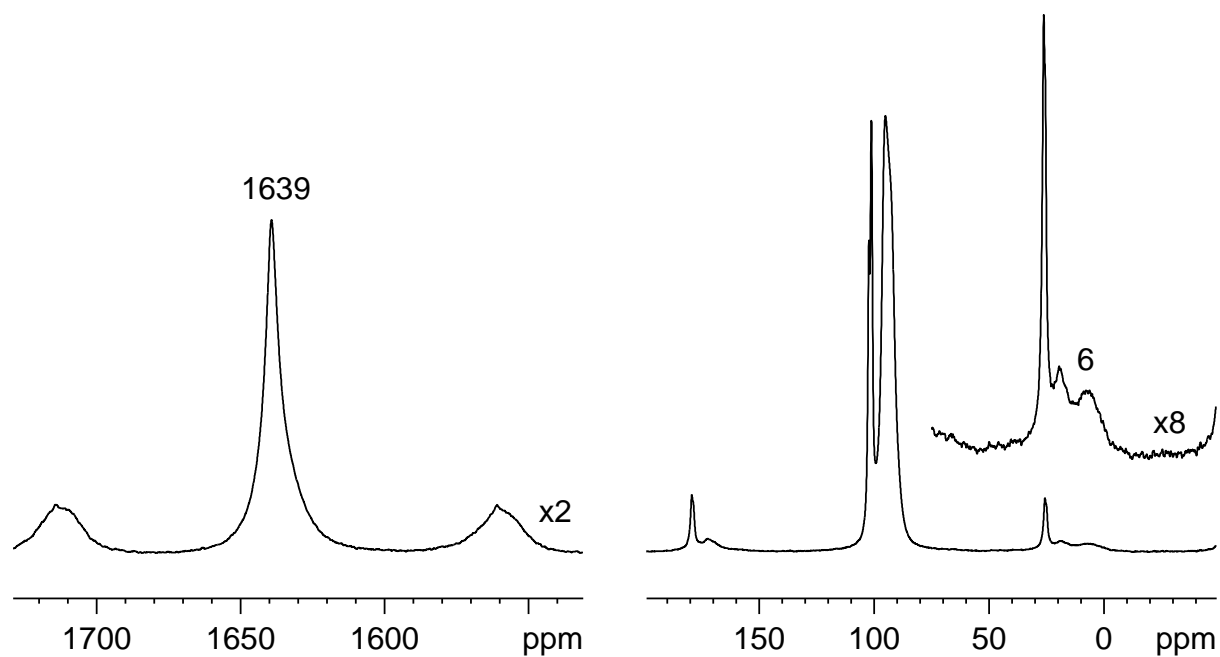

**Fig. S2**  $^{27}\text{Al}$  MAS NMR spectra of a 10:1:1 mixture of  $\text{NaAlH}_4$ , 18C6 and polymeric  $\text{AlH}_3$  after ball-milling at  $T = 77$  K recorded at 304 K and  $\nu_{\text{MAS}} = 10$  kHz. This is the same spectrum as in Fig. 4a, but showing the regions with the lines of metallic aluminium (at about 1639 ppm, left) and the polymeric  $\text{AlH}_3$  (at about 6 ppm, inset on the right).
